# Supplementary material for: Quantitative proteomic analysis reveals potential diagnostic markers and pathways involved in pathogenesis of renal cell carcinoma
Source: PubMed Central journal article supplement (PMC3964225; doi:10.18632/oncotarget.1529), 2014-01-18

**Supplementary  
Figure 1**

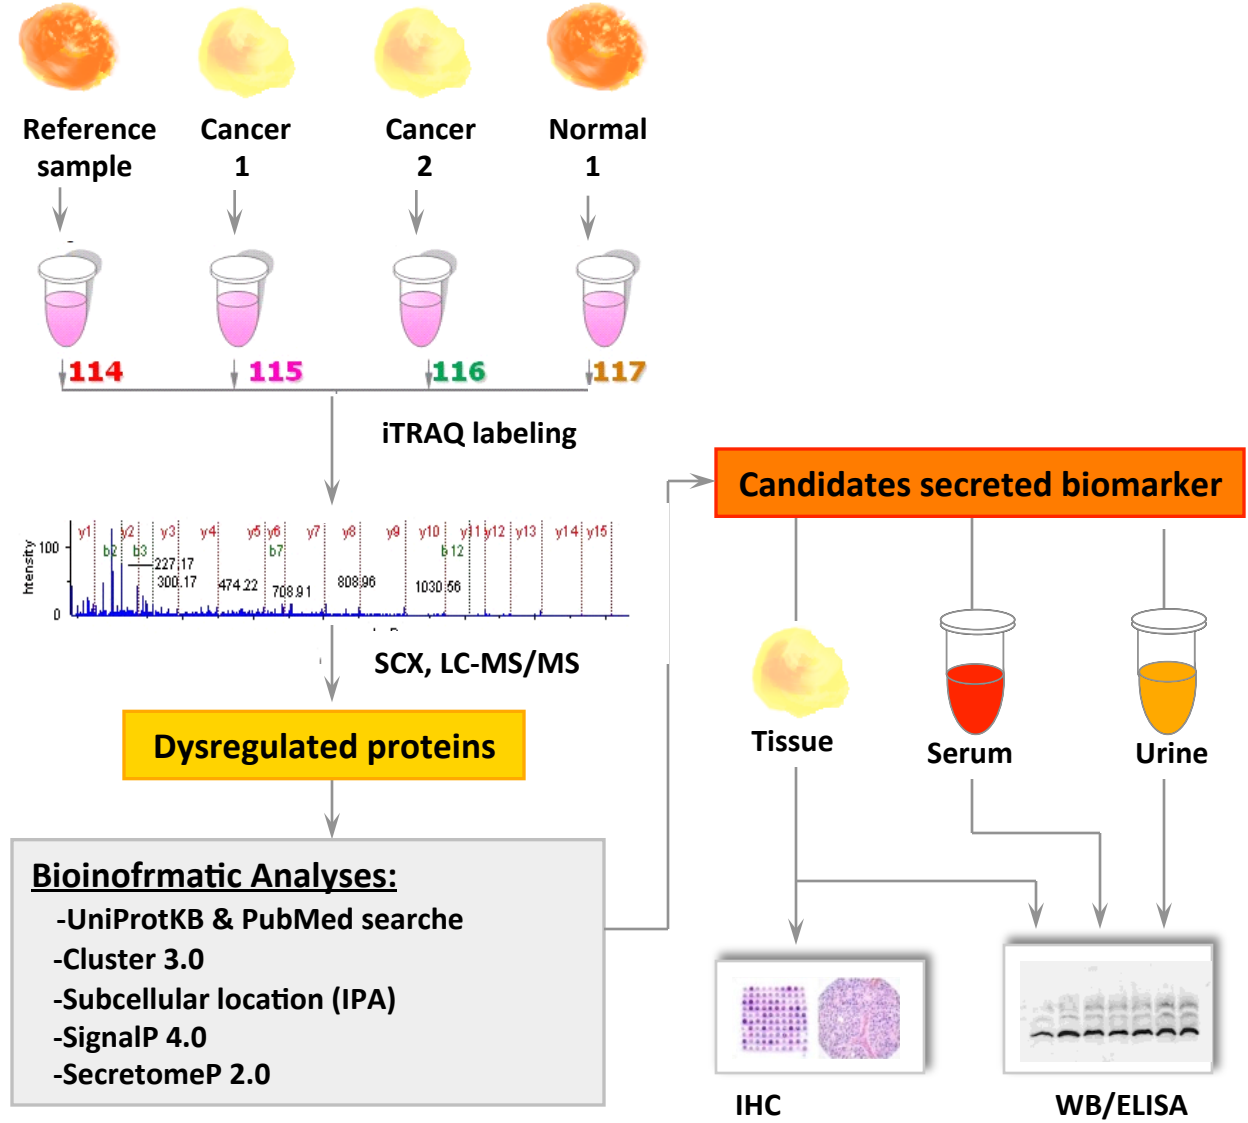

Supplement: oncotarget-05-506-s001.pdf [file oncotarget-05-506-s001.pdf]
